# Supplementary material
Source: Springer Nature journal article supplement (https://www.springermedizin.de/resource/supplementary/13256_2011_1752_MOESM3_ESM.pdf/9648452)

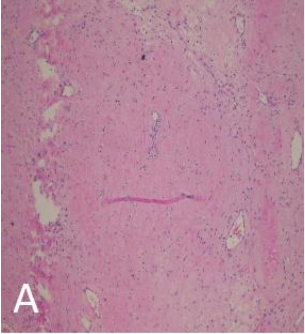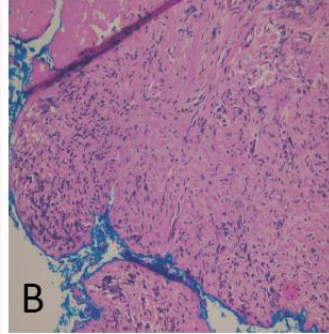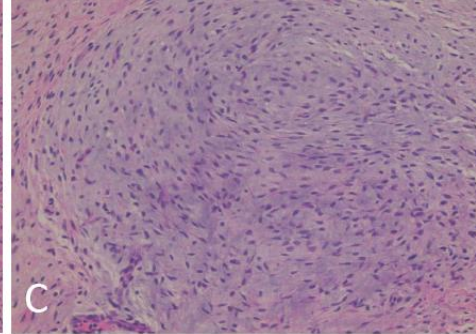

Supplement: MOESM3 [file 9648452]
